# Supplementary material for: Nonsense Mediated Decay Resistant Mutations Are a Source of Expressed Mutant Proteins in Colon Cancer Cell Lines with Microsatellite Instability
Source: PLoS One. 2010 Dec 31;5(12):e16012. doi: 10.1371/journal.pone.0016012 (PMC3013145; doi:10.1371/journal.pone.0016012)
Supplement: Table S4 — Coding microsatellite (cMS) sequencing data for genes selected from genome‐wide search for NMD‐resistant transcripts. (XLS) [file pone.0016012.s006.xls]

## Sheet: Supp 2b
Table S4. Coding microsatellite (cMS) sequencing data for genes selected from genome-wide search for NMD-resistant transcripts.
	Gene	ASXL1	MED8	SFRS12IP1	FBXL3	RGS12	RTKN2	RTN3	TMEM97	ANKRD49	SAFB2	VRK2	EAPP	NTAN1	RAPH1	CCKBR	P4HB	RAB40C	ST8SIA6	C15orf48	CIR	DYRK3	ERCC5	GPATCH4	HOXB7	INTS8	KCNC1	RARRES3	SF3B2	SP100	TCERG1	WHSC1	ZNF133
	NCBI GI no.	29570782	155030190	27883882	16306584	4506509	26190614	41393604	109948302	41350198	7661936	194440707	117938268	27735049	47132519	28875799	20070125	46195789	54234057	14165280	40068059	51702240	51988900	33356550	85068580	70608109	4826786	149588791	55749531	19923236	21327715	109633019	134142822
	cMS	G8	A9	A10	T9	A9	A9	A8	A10	A9	C8	A8	A8	A8	C8	T8	A8	C8	A8	A9	A9	A8	A9	A8	G8	A8	A8	A8	A8	A8	A8	C8	A8
	cMS 1st codon	1927	876	262	876	3526	1340	751	519	200	2827	1082	367	883	2287	1022	1153	804	746	132	857	898	2743	607	184	2947	1363	476	2618	2275	2940	4021	188
Cell line	MSI/NMD status	NMD-R	NMD-R	NMD-R	NMD-R	NMD-R	NMD-R	NMD-R	NMD-R	NMD-R	NMD-R	NMD-R	NMD-R	NMD-R	NMD-R	NMD-R	NMD-R	NMD-R	NMD-R	NMD-R	NMD-R	NMD-R	NMD-R	NMD-R	NMD-R	NMD-R	NMD-R	NMD-R	NMD-R	NMD-R	NMD-R	NMD-R	NMD-R
SW1222	MSS	n.a.	wt	n.a.	wt	wt	n.a.	n.a.	n.a.	n.a.	n.a.	n.a.	n.a.	n.a.	n.a.	n.a.	n.a.	n.a.	n.a.	n.a.	wt	n.a.	n.a.	n.a.	n.a.	n.a.	wt	n.a.	n.a.	wt	n.a.	n.a.	n.a.
SW480	MSS	wt	wt	wt	wt	wt	wt	+1	wt	wt	wt	wt	wt	wt	wt	wt	wt	wt	wt	wt	wt	wt	wt	wt	wt	wt	wt	wt	wt	wt	wt	wt	wt
LIM1863	MSS	n.a.	wt	n.a.	wt	wt	n.a.	n.a.	n.a.	n.a.	n.a.	n.a.	n.a.	n.a.	n.a.	n.a.	n.a.	n.a.	n.a.	n.a.	wt	n.a.	n.a.	n.a.	n.a.	n.a.	wt	n.a.	n.a.	wt	n.a.	n.a.	n.a.
LIM2099	MSS	n.a.	wt	n.a.	wt	wt	n.a.	n.a.	n.a.	n.a.	n.a.	n.a.	n.a.	n.a.	n.a.	n.a.	n.a.	n.a.	n.a.	n.a.	wt	n.a.	n.a.	n.a.	n.a.	n.a.	wt	n.a.	n.a.	wt	n.a.	n.a.	n.a.
LIM2463	MSS	n.a.	wt	n.a.	wt	wt	n.a.	n.a.	n.a.	n.a.	n.a.	n.a.	n.a.	n.a.	n.a.	n.a.	n.a.	n.a.	n.a.	n.a.	wt	n.a.	n.a.	n.a.	n.a.	n.a.	wt	n.a.	n.a.	wt	n.a.	n.a.	n.a.
HT29	MSS	n.a.	wt	n.a.	wt	wt	n.a.	n.a.	n.a.	n.a.	n.a.	n.a.	n.a.	n.a.	n.a.	n.a.	n.a.	n.a.	n.a.	n.a.	wt	n.a.	n.a.	n.a.	n.a.	n.a.	wt	n.a.	n.a.	wt	n.a.	n.a.	n.a.
HCA-7	MSI	-1, wt	wt	-1	wt	wt	wt	-1, wt	wt	wt	+1, wt	-1, wt	wt	-1, wt	-1, wt	wt	-1, wt	+2, wt	-1, wt	wt	wt	wt	wt	wt	wt	wt	wt	wt	wt	wt	wt	wt	wt
HCT116	MSI	+1, wt	wt	-1, wt	-1, wt	wt	wt	-1, wt	-1, wt	wt	-1, wt	wt	wt	wt	wt	wt	wt	wt	wt	wt	wt	wt	wt	wt	wt	wt	wt	wt	wt	wt	wt	wt	wt
LoVo	MSI	-1, wt	-1, wt	wt	wt	wt	-1, wt	wt	wt	-1, wt	wt	wt	-1, wt	wt	wt	-1, wt	wt	wt	wt	wt	wt	wt	wt	wt	wt	wt		wt	wt	wt	wt	wt	wt
LS174T	MSI	-1, wt	-2, -1	-2, -1	wt	-1, wt	wt	wt	wt	wt	wt	wt	wt	wt	wt	wt	wt	wt	wt	wt	wt	wt	wt	wt	wt	wt	wt	wt	wt	wt	wt	wt	wt
LIM1215	MSI	wt	wt	wt	wt	wt	-1, wt	wt	wt	wt	wt	-1, wt	wt	wt	wt	wt	wt	wt	wt	wt	wt	wt	wt	wt	wt	wt	wt	wt	wt	wt	wt	wt	wt
LIM1899	MSI	wt	wt	-1, wt	wt	-1, +1	wt	wt	-1, wt	wt	-1, wt	+1, wt	wt	-1, wt	-1, wt	wt	wt	wt	wt	n.a.	wt	n.a.	n.a.	n.a.	n.a.	n.a.	wt	n.a.	n.a.	wt	n.a.	n.a.	n.a.
LIM2405	MSI	wt	-2, -1	wt	-1, wt	-1, wt	-1, wt	-1, wt	wt	-1, wt	wt	wt	wt	wt	wt	wt	wt	wt	wt	n.a.	wt	n.a.	n.a.	n.a.	n.a.	n.a.	wt	n.a.	n.a.	wt	n.a.	n.a.	n.a.
LIM2408	MSI	wt	-1, wt	-1	-1, wt	-1, wt	-1, wt	-1, wt	wt	-1, wt	wt	wt	wt	wt	wt	wt	wt	wt	wt	n.a.	wt	n.a.	n.a.	n.a.	n.a.	n.a.	wt	n.a.	n.a.	wt	n.a.	n.a.	n.a.
LIM2537	MSI	-1, wt	-1, wt	wt	-1, wt	wt	wt	wt	-1, wt	wt	wt	wt	wt	wt	wt	wt	wt	wt	wt	n.a.	wt	n.a.	n.a.	n.a.	n.a.	n.a.	wt	n.a.	n.a.	wt	n.a.	n.a.	n.a.
LIM2550	MSI	-1, wt	-1, wt	wt	-1, wt	wt	wt	wt	-1, wt	wt	wt	wt	wt	wt	wt	wt	wt	wt	wt	n.a.	wt	n.a.	n.a.	n.a.	n.a.	n.a.	wt	n.a.	n.a.	wt	n.a.	n.a.	n.a.
LIM2551	MSI	wt	wt	-1	wt	-1, wt	wt	wt	wt	wt	wt	wt	-1, wt	wt	wt	wt	wt	wt	wt	n.a.	wt	n.a.	n.a.	n.a.	n.a.	n.a.	wt	n.a.	n.a.	wt	n.a.	n.a.	n.a.
	Mutation rate	0.545455	0.545455	0.545455	0.454545	0.454545	0.363636	0.363636	0.363636	0.272727	0.272727	0.272727	0.181818	0.181818	0.181818	0.0909091	0.0909091	0.0909091	0.0909091	0	0	0	0	0	0	0	0	0	0	0	0	0	0
	Method	Sanger	F.A.	Sanger	F.A.	F.A.	Sanger	Sanger	Sanger	Sanger	Sanger	Sanger	Sanger	Sanger	Sanger	Sanger	Sanger	Sanger	Sanger	Sanger	F.A.	Sanger	Sanger	Sanger	Sanger	Sanger	F.A.	Sanger	Sanger	F.A.	Sanger	Sanger	Sanger
	Summary of cMS mutations detected for all cell lines in this study. NMD-S = predicted NMD-sensitive, NMD-R = predicted NMD-resistant. Alleles detected indicated (wt - wild type, (-1) = deletion of 1 base.
	Method used for cMS analysis indicated (Sanger = DNA Sanger sequencing. F.A. = fragment analysis).
